# Supplementary material for: Association between urban environment and mental health in Brussels, Belgium
Source: PubMed Central journal article supplement (PMC8015067; doi:10.1186/s12889-021-10557-7), 2021-04-01

### Depressive disorders

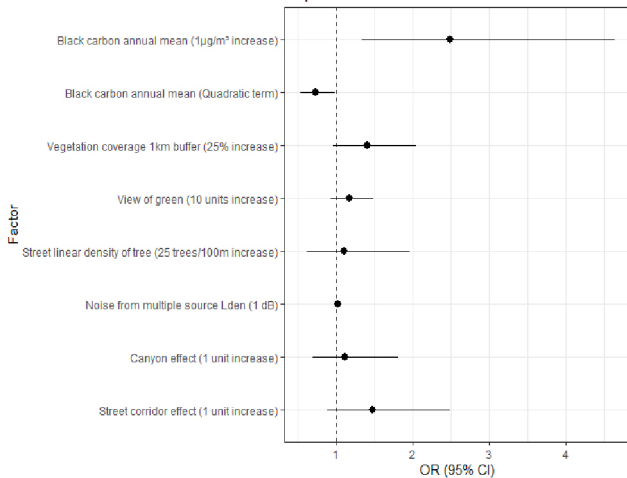

### Sleeping disorders

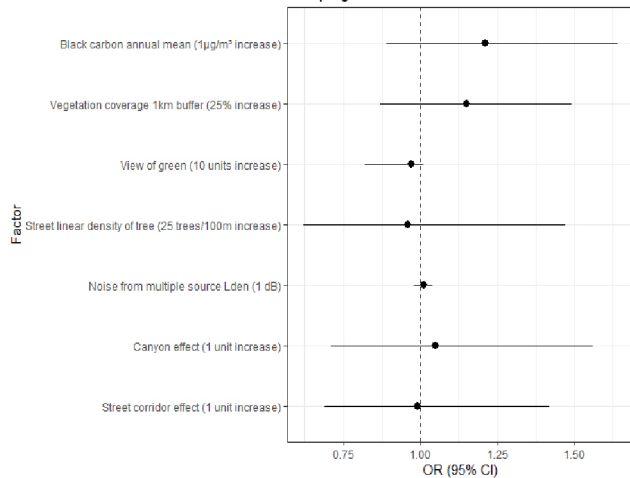

### Anxiety disorders

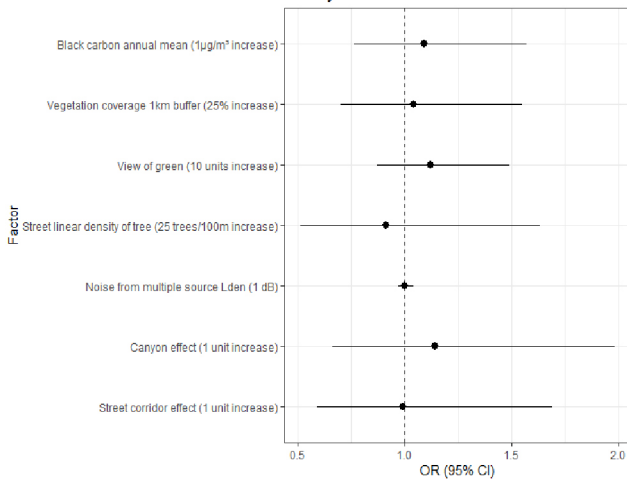

### Psychological distress (GHQ4)

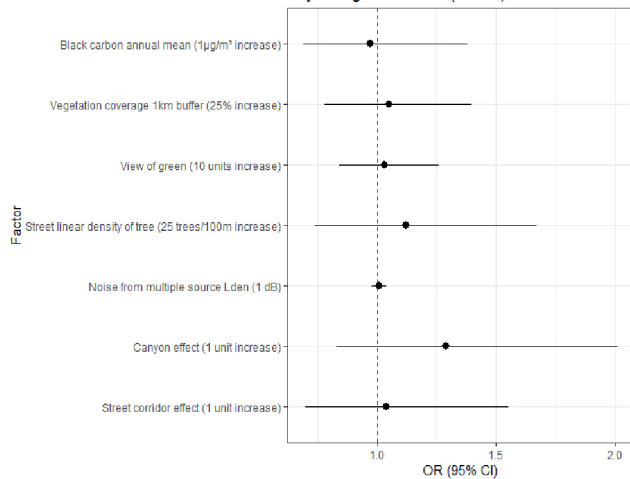

Supplement: 12889_2021_10557_MOESM3_ESM.pdf [file 12889_2021_10557_MOESM3_ESM.pdf]
