# Supplementary material for: Association between urban environment and mental health in Brussels, Belgium
Source: PubMed Central journal article supplement (PMC8015067; doi:10.1186/s12889-021-10557-7), 2021-04-01
Supplement: 12889_2021_10557_MOESM7_ESM.pdf [file 12889_2021_10557_MOESM7_ESM.pdf]

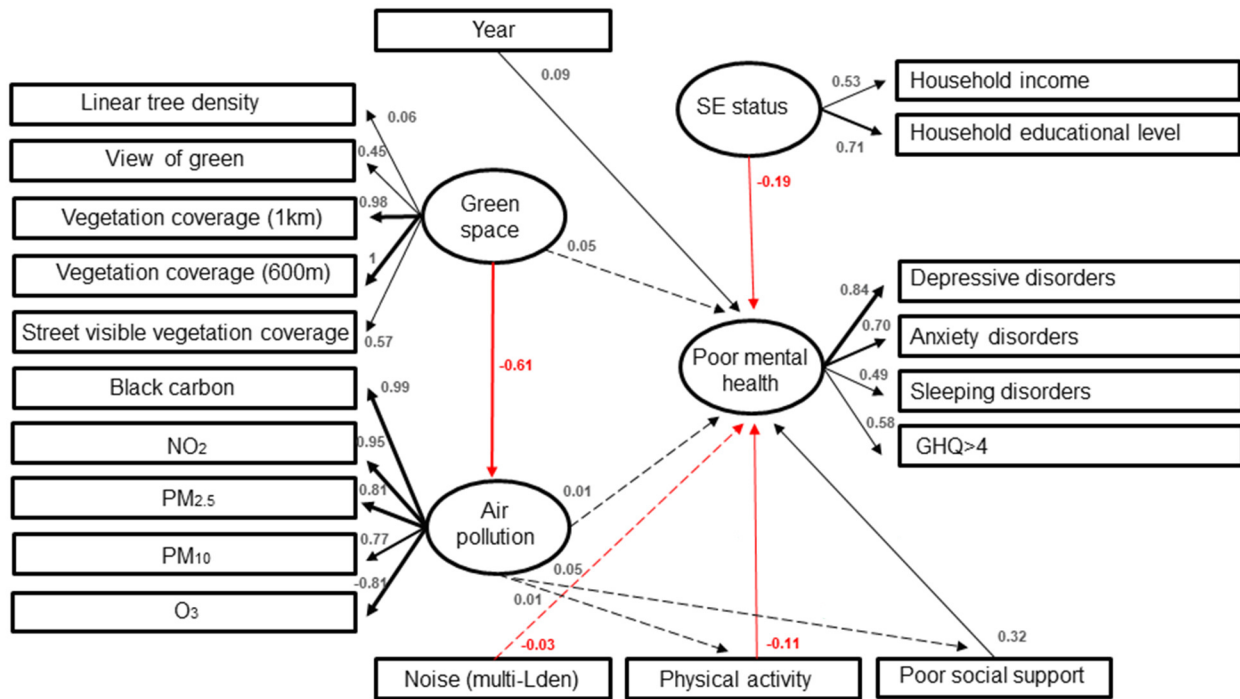

Latent variable   
  Observed variable   
  Regression path   
  Significant regression path   
 +/- Sign of association
