# Supplementary material for: Association between urban environment and mental health in Brussels, Belgium
Source: Springer Nature journal article supplement (doi:10.1186/s12889-021-10557-7), 2021-04-01
Supplement: MOESM5 [file 19029450]

| Latent Variables                                                  | Estimate | SE    | z       | p      | Std.all |
|-------------------------------------------------------------------|----------|-------|---------|--------|---------|
| <b>Mental health</b>                                              |          |       |         |        |         |
| Depressive disorders                                              | 1.000    |       |         |        | 0.840   |
| Anxiety disorders                                                 | 0.660    | 0.032 | 21.850  | <0.001 | 0.700   |
| Sleeping disorders                                                | 0.690    | 0.040 | 16.060  | <0.001 | 0.490   |
| GHQ-4                                                             | 0.740    | 0.044 | 18.900  | <0.001 | 0.580   |
| <b>Green space</b>                                                |          |       |         |        |         |
| Linear tree density                                               | 1.000    |       |         |        | 0.062   |
| View of green                                                     | 7.142    | 3.140 | 2.242   | 0.025  | 0.451   |
| Vegetation coverage (1km)                                         | 15.491   | 6.769 | 2.259   | 0.024  | 0.976   |
| Vegetation coverage (600m)                                        | 16.776   | 6.893 | 2.259   | 0.024  | 0.996   |
| Street visible vegetation coverage (and 10 meters on either side) | 8.977    | 3.948 | 2.250   | 0.024  | 0.569   |
| <b>Air pollution</b>                                              |          |       |         |        |         |
| Black carbon                                                      | 1.000    |       |         |        | 0.988   |
| NO2                                                               | 0.959    | 0.011 | 90.368  | <0.001 | 0.948   |
| PM2.5                                                             | 0.820    | 0.017 | 48.038  | <0.001 | 0.811   |
| PM10                                                              | 0.776    | 0.019 | 41.822  | <0.001 | 0.766   |
| O3                                                                | -0.820   | 0.019 | -38.901 | <0.001 | -0.810  |
| <b>Socio-economic status</b>                                      |          |       |         |        |         |
| Reported household income                                         | 1.000    |       |         |        | 0.530   |
| Highest household educational level                               | 1.070    | 0.140 | 7.350   | <0.001 | 0.710   |
| <b>Noise</b>                                                      |          |       |         |        |         |
| Multi (Lden)                                                      | 1.000    |       |         |        | 1.000   |
| <b>Model 1</b>                                                    |          |       |         |        |         |
| <b>Regression</b>                                                 |          |       |         |        |         |
| Air pollution ~green space                                        | -9.543   | 4.181 | -2.283  | 0.022  | -0.609  |
| Physical activity ~green space                                    | -0.652   | 0.438 | -1.487  | 0.137  | -0.054  |
| Social support ~green space                                       | -0.349   | 0.236 | -1.478  | 0.139  | -0.053  |
| Mental health ~                                                   |          |       |         |        |         |
| Air pollution                                                     | 0.005    | 0.012 | 0.399   | 0.690  | 0.015   |
| Physical activity                                                 | -0.047   | 0.012 | -4.002  | <0.001 | -0.115  |
| Social support                                                    | 0.243    | 0.022 | 11.107  | <0.001 | 0.324   |
| Noise                                                             | -0.001   | 0.009 | -0.098  | 0.922  | -0.003  |
| Socio-economic status                                             | -0.112   | 0.025 | -4.407  | <0.001 | -0.191  |
| Year                                                              | 0.011    | 0.004 | 3.138   | <0.001 | 0.090   |
| Green space                                                       | 0.026    | 0.191 | 0.137   | 0.891  | 0.005   |
| <b>Covariance</b>                                                 |          |       |         |        |         |
| Green space~~                                                     |          |       |         |        |         |
| Socio-economic status                                             | 0.010    | 0.005 | 2.151   | 0.031  | 0.294   |
| Noise                                                             | -0.004   | 0.003 | -1.671  | 0.095  | -0.068  |
| Socio-economic status ~noise                                      | -0.109   | 0.022 | -4.932  | <0.001 | -0.205  |
| <b>Model 2</b>                                                    |          |       |         |        |         |
| <b>Regression</b>                                                 |          |       |         |        |         |
| Air pollution ~green space                                        | -9.549   | 4.186 | -2.281  | 0.023  | -0.609  |
| Physical activity ~air pollution                                  | 0.008    | 0.021 | 0.355   | 0.723  | 0.010   |
| Social support ~air pollution                                     | 0.021    | 0.012 | 1.835   | 0.067  | 0.051   |
| Mental health ~                                                   |          |       |         |        |         |
| Air pollution                                                     | 0.005    | 0.012 | 0.399   | 0.690  | 0.015   |
| Physical activity                                                 | -0.047   | 0.012 | -4.007  | <0.001 | -0.115  |
| Social support                                                    | 0.243    | 0.022 | 11.108  | <0.001 | 0.324   |
| Noise                                                             | -0.001   | 0.009 | -0.098  | 0.922  | -0.030  |
| Socio-economic status                                             | -0.112   | 0.025 | -4.407  | <0.001 | -0.191  |
| Year                                                              | 0.011    | 0.004 | 3.138   | <0.001 | 0.090   |
| Green space                                                       | 0.026    | 0.191 | 0.137   | 0.891  | 0.005   |
| <b>Covariance</b>                                                 |          |       |         |        |         |
| Green space~~                                                     |          |       |         |        |         |
| Socio-economic status                                             | 0.010    | 0.005 | 2.150   | 0.032  | 0.294   |
| Noise                                                             | -0.004   | 0.003 | -1.670  | 0.095  | -0.068  |
| Socio-economic status ~noise                                      | -0.109   | 0.022 | -4.932  | <0.001 | -0.205  |
