# Supplementary material for: Association between urban environment and mental health in Brussels, Belgium
Source: BMC Public Health. 2021 Apr 1;21:635. doi: 10.1186/s12889-021-10557-7 (PMC8015067; doi:10.1186/s12889-021-10557-7)
Supplement: Supplementary file 6 — Additional file 6. Unstandardized estimates of indirect effect of green space on mental health calculated in model 1 and model 2. [file 12889_2021_10557_MOESM6_ESM.pdf]

| Model 1                                                                                           | Estimate | SE    | z      | p     |
|---------------------------------------------------------------------------------------------------|----------|-------|--------|-------|
| Indirect effect through air pollution                                                             | -0.044   | 0.112 | -0.393 | 0.690 |
| Indirect effect through physical activity                                                         | 0.03     | 0.022 | 1.394  | 0.160 |
| Indirect effect through social support                                                            | -0.085   | 0.058 | -1.465 | 0.143 |
| Indirect effect through air pollution,<br>physical activity and social support                    | -0.098   | 0.127 | -0.772 | 0.440 |
| Model 2                                                                                           |          |       |        |       |
| Indirect effect through air pollution<br>and subsequently physical activity                       | 0.003    | 0.01  | 0.349  | 0.720 |
| Indirect effect through air pollution<br>and subsequently social support                          | -0.049   | 0.03  | -1.418 | 0.156 |
| Indirect effect through air pollution<br>and subsequently physical activity<br>and social support | -0.046   | 0.03  | -1.305 | 0.192 |
